# Supplementary material for: A systematic survey of conformational states in β1 and β4 integrins using negative-stain electron microscopy
Source: Oxford University Press journal article supplement (doi:10.1242/jcs.216754), 2018-04-26
Supplement: jcs216754supp.pdf [file jcs216754supp.pdf]

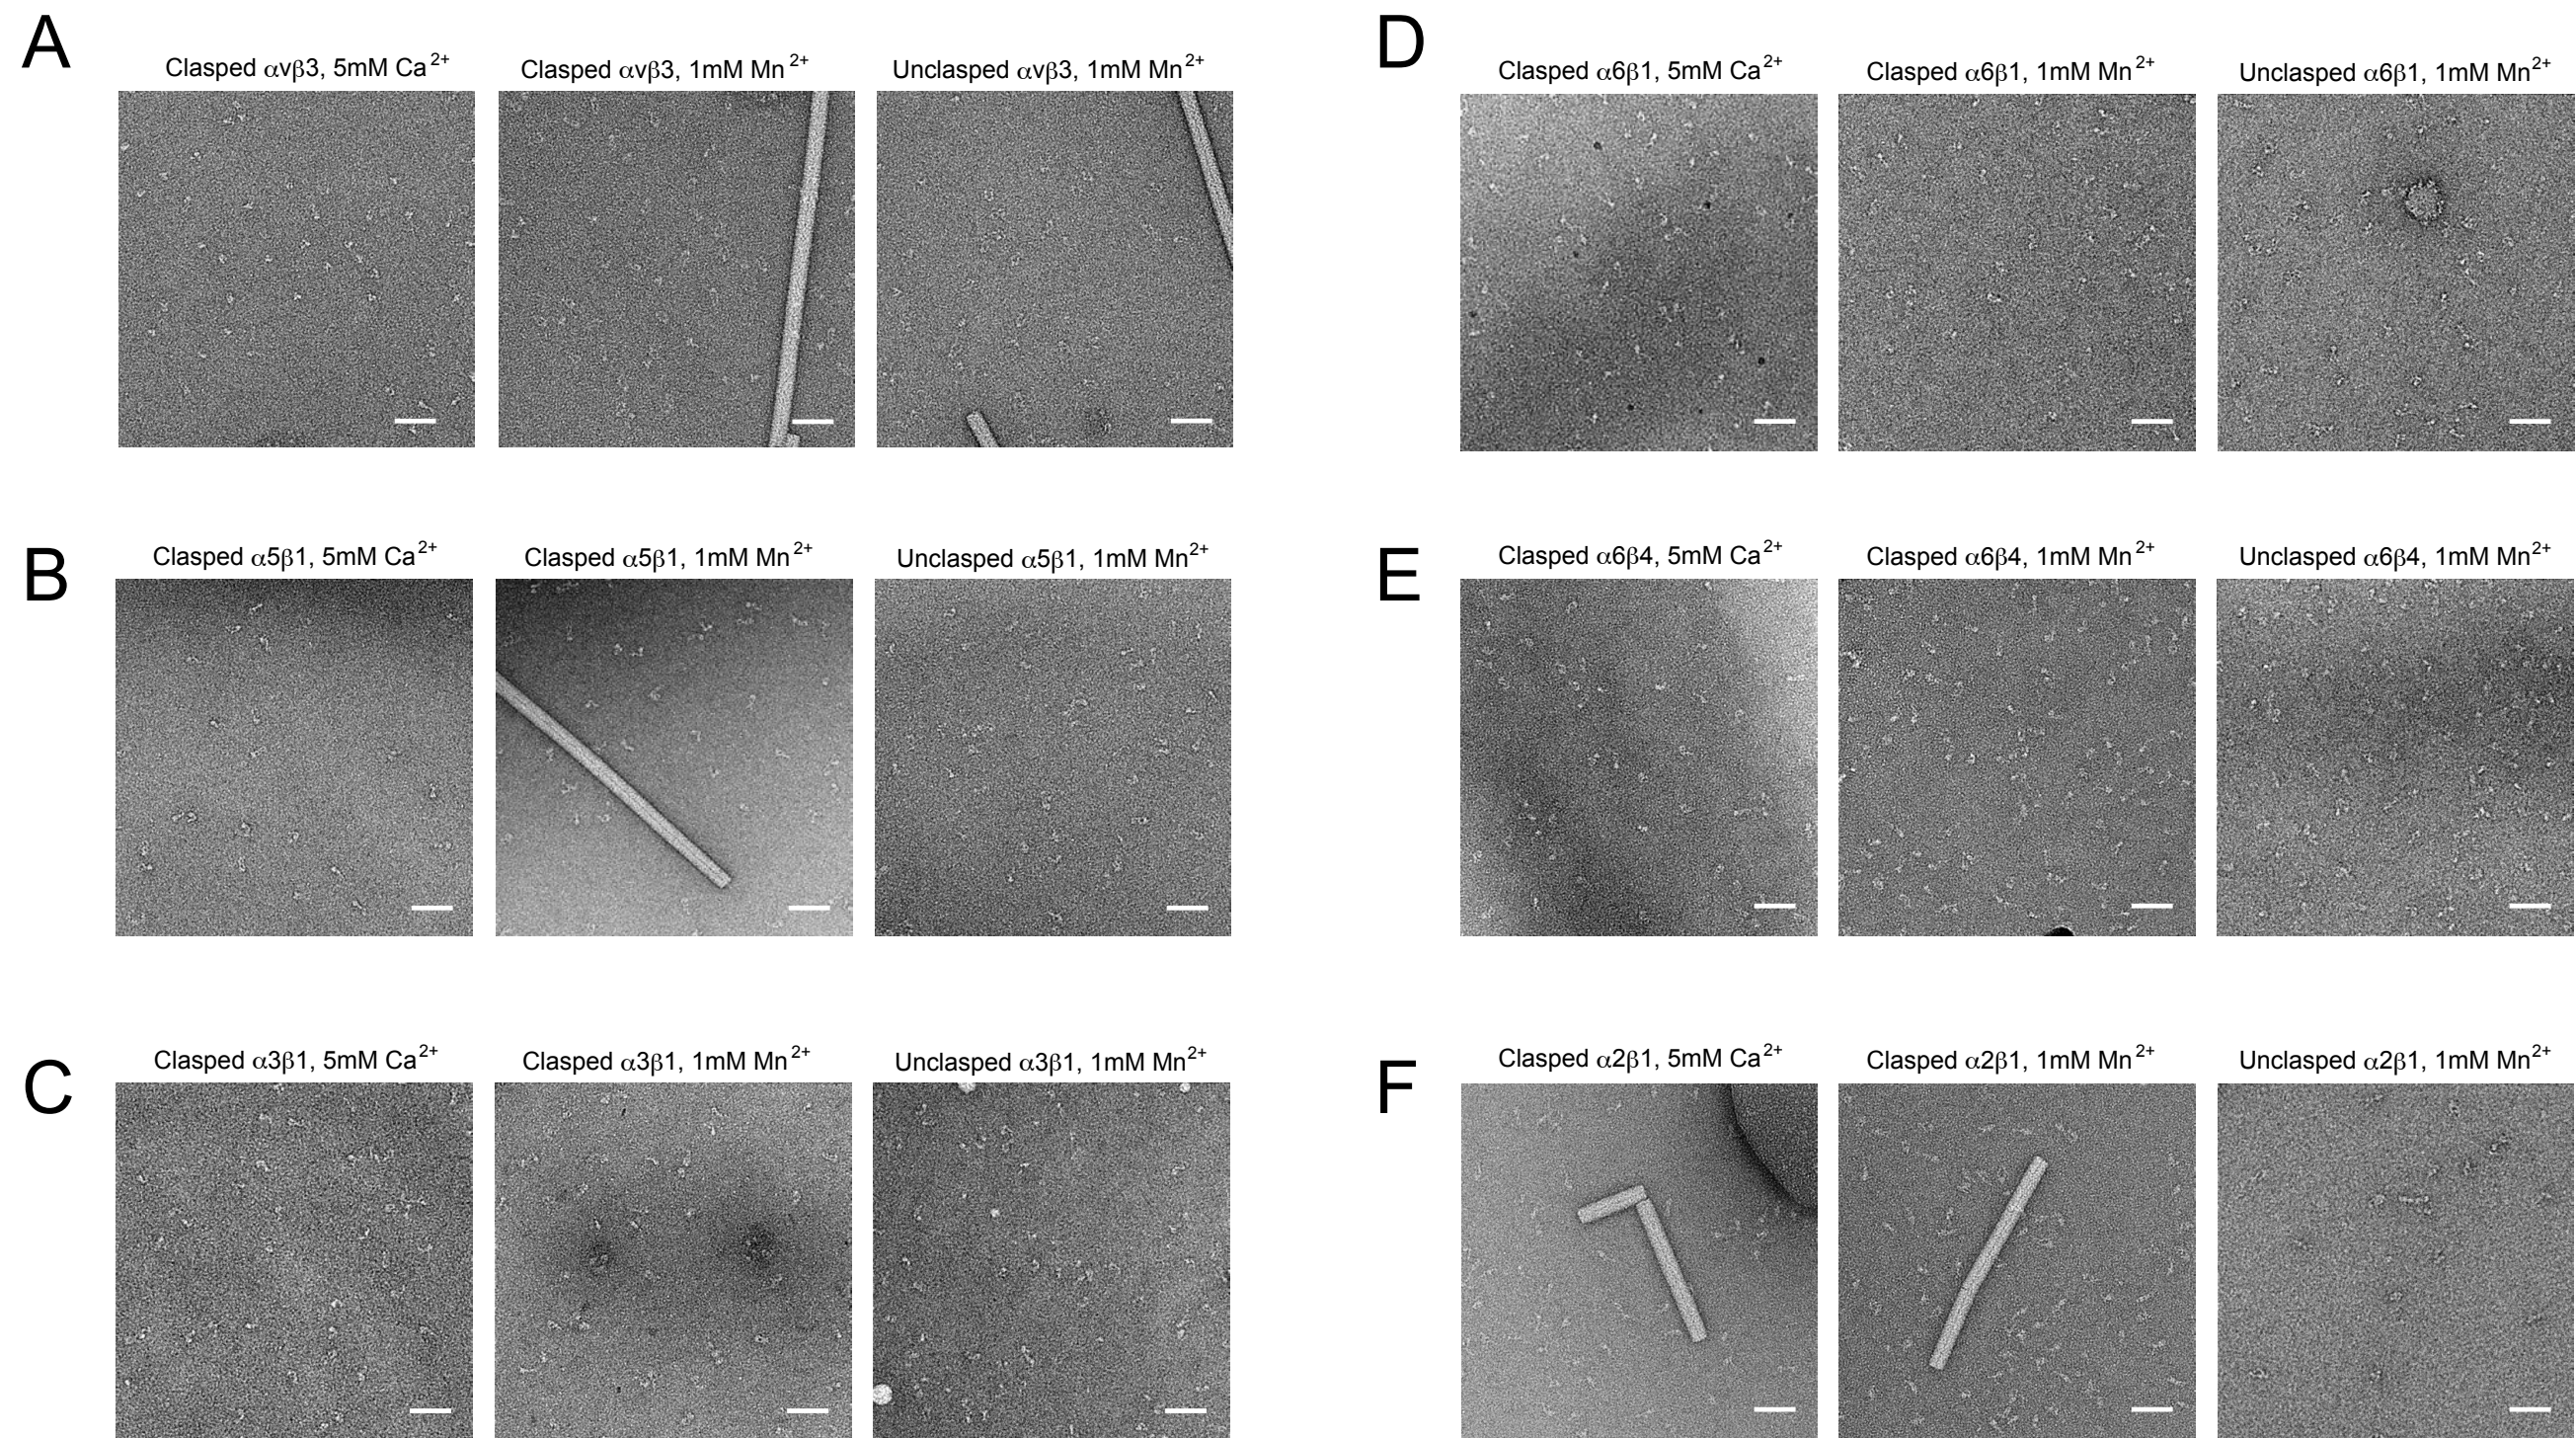

Fig. S1. Representative raw EM micrographs of negatively stained integrins under three conditions. (A)  $\alpha v\beta 3$  integrin, (B)  $\alpha 5\beta 1$  integrin, (C)  $\alpha 3\beta 1$  integrin, (D)  $\alpha 6\beta 1$  integrin, (E)  $\alpha 6\beta 4$  integrin, and (F)  $\alpha 2\beta 1$  integrin. Large rod-like objects in A, B and F are tobacco mosaic virus. Bars, 50 nm.



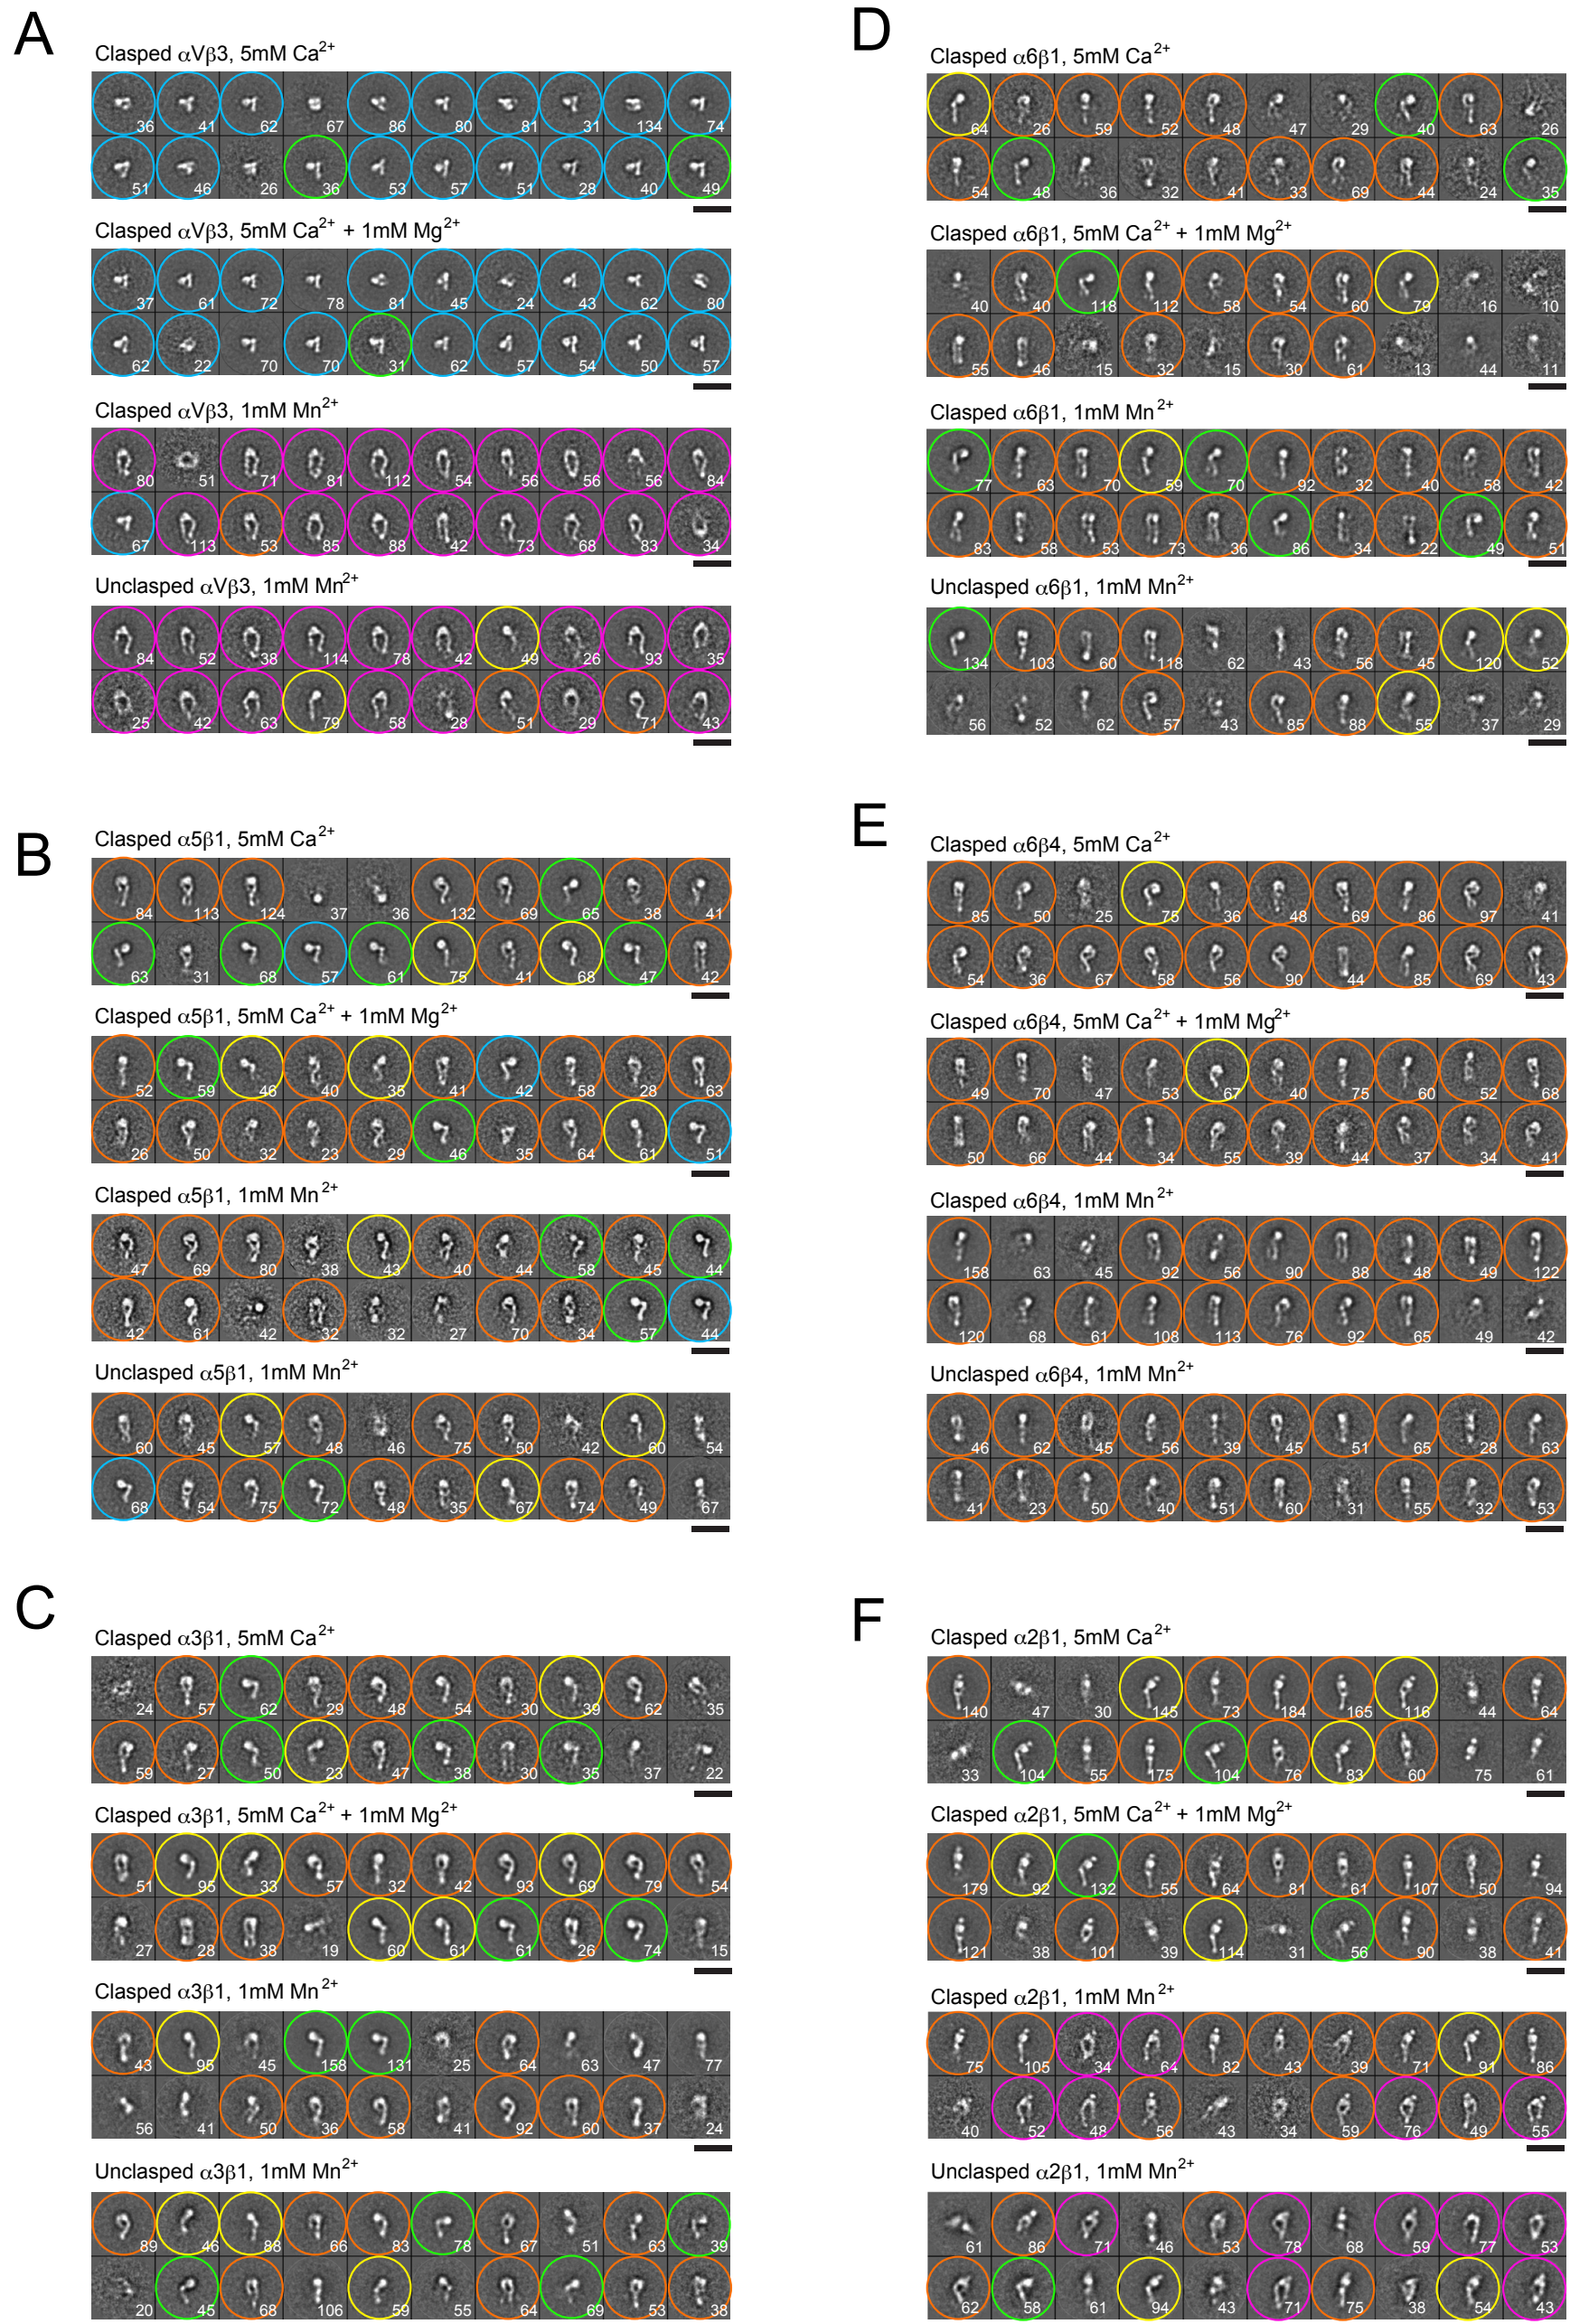

Fig. S2. A gallery of 20 class averages of  $\alpha V\beta 3$  (A),  $\alpha 5\beta 1$  (B),  $\alpha 3\beta 1$  (C),  $\alpha 6\beta 1$  (D),  $\alpha 6\beta 4$  (E), and  $\alpha 2\beta 1$  (F) integrins obtained from ~1,000 picked particles under each condition. The number of individual particles represented by each class average is shown at the bottom right corner. Each class average is categorized into 5 groups according to its shape and marked by a color-coded circle as described in the legend to Fig. 3. Classes with poor image resolution or ambiguous shape were not grouped. Bar: 25 nm.
